# Supplementary material for: TMEM106B in Glioma: Diagnostic Potential and Mechanistic Implications
Source: Research Square preprint supplement (doi:10.21203/rs.3.rs-7776786/v1), 2025-10-29

Uncropped original images for all Western blots presented in the main figures

SF295

Figure 5C, TMEM106B

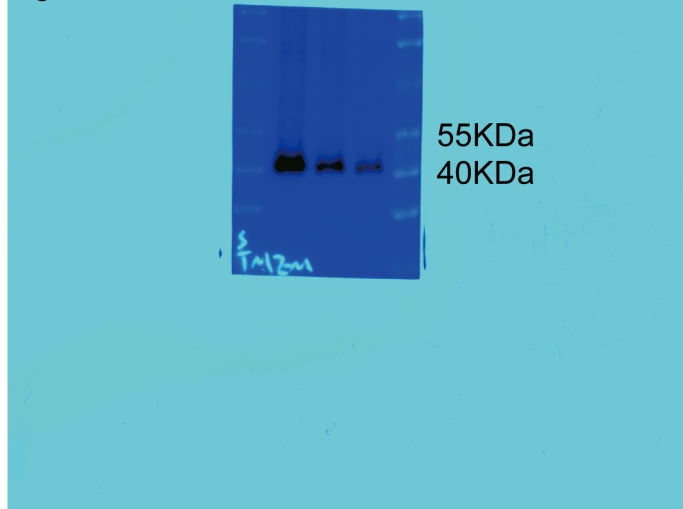

Figure 5C,  $\beta$ -actin

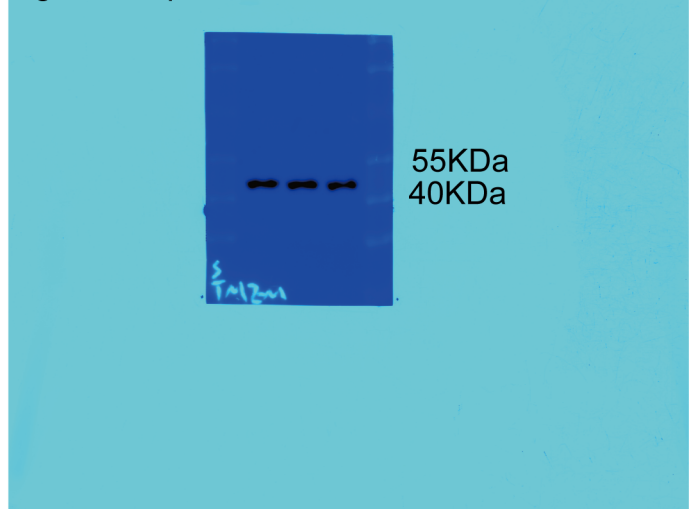

LN18

Figure 5D, TMEM106B

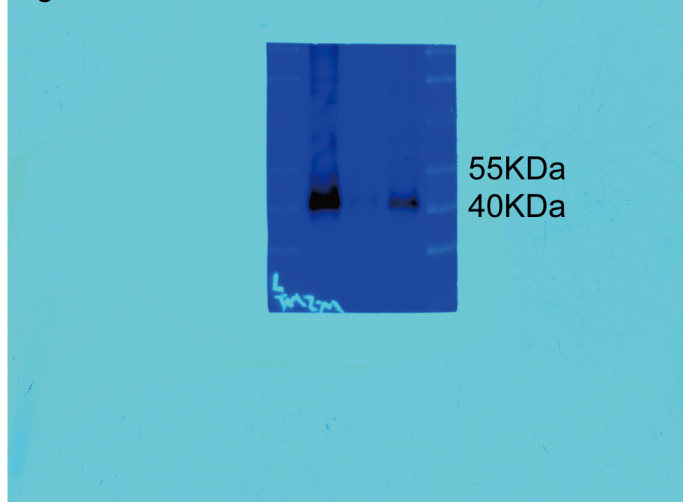

Figure 5D,  $\beta$ -actin

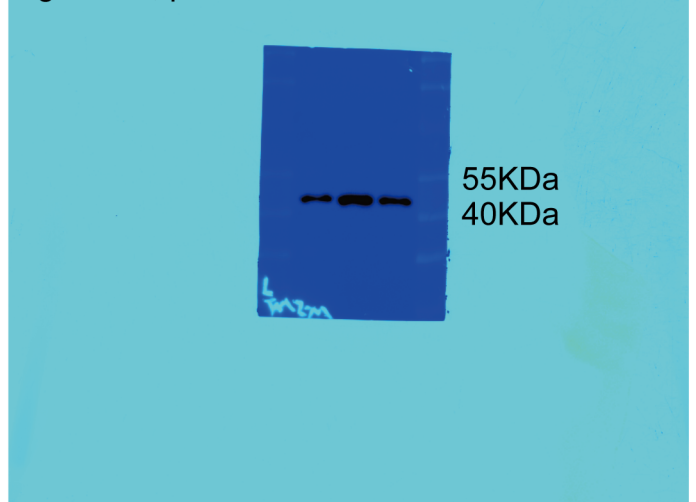

Supplement: Supplementary file 1 [file d30a98d91c1b65a7bbe5470a.pdf]
